# Supplementary material for: Anharmonicity induced faster decay of hot phonons in rutile TiO2 nanorods: a Raman spectromicroscopy study
Source: Royal Society of Chemistry journal article supplement (doi:10.1039/d1ma00940k), 2021-12-14
Supplement: d1ma00940k1.pdf [file d1ma00940k1.pdf]

## **Supplementary Information**

# Anharmonicity Induced Faster Decay of Hot Phonons in Rutile

## TiO<sub>2</sub> Nanorods: A Raman Spectromicroscopic study

Chanchal Rani<sup>1</sup>, Devesh K. Pathak<sup>1</sup>, Manushree Tanwar<sup>1</sup>, Suchita Kandpal<sup>1</sup>, Tanushree Ghosh<sup>1</sup>,

Maxim Yu. Maximov<sup>2</sup>, Rajesh Kumar<sup>1,3, 4\*</sup>

<sup>1</sup>Materials and Device Laboratory, Department of Physics, Indian Institute of Technology Indore, Simrol- 453552, India

<sup>2</sup>Peter the Great Saint-Petersburg Polytechnic University, 1952521, Saint Petersburg, Russia.

<sup>3</sup>Centre for Advanced Electronics, Indian Institute of Technology Indore, Simrol- 453552, India.

<sup>4</sup>Centre for Indian Scientific Knowledge Systems, Indian Institute of Technology Indore, Simrol-453552, India.

\* Email: [rajeshkumar@iiti.ac.in](mailto:rajeshkumar@iiti.ac.in)

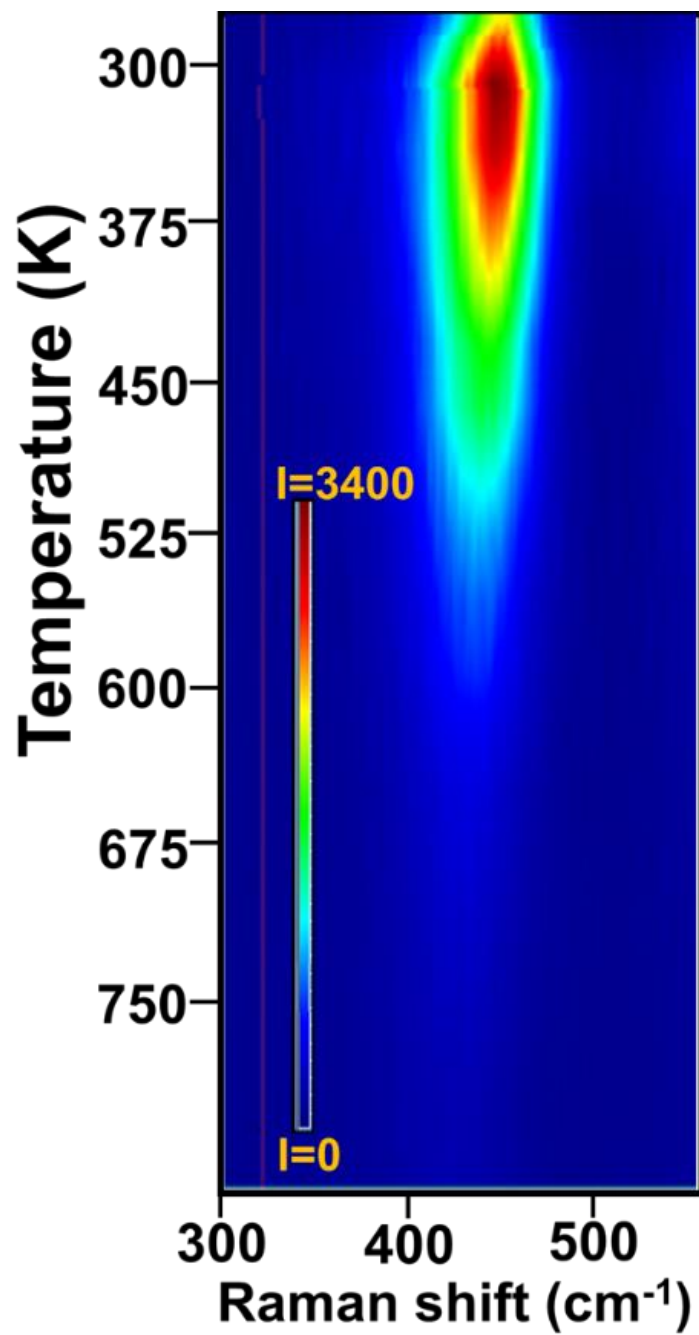

Figure S1: Zoomed version of thermal Raman map (Figure 3, main text) of  $E_g$  Raman mode of rutile  $\text{TiO}_2$  nanorods.

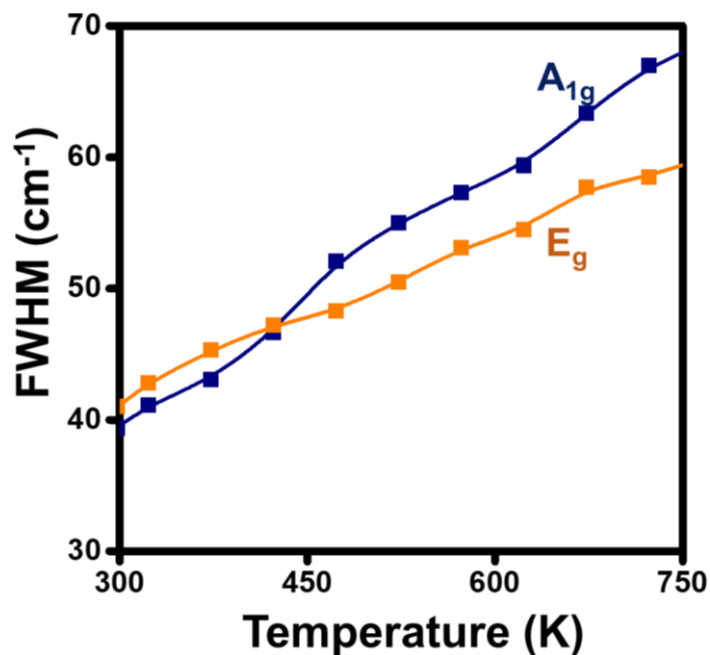

Figure S2: FWHM vs. Temperature from the range room temperature (300K) to High temperature (750K) for both Raman modes (E<sub>g</sub> and A<sub>1g</sub>) of rutile TNRs.

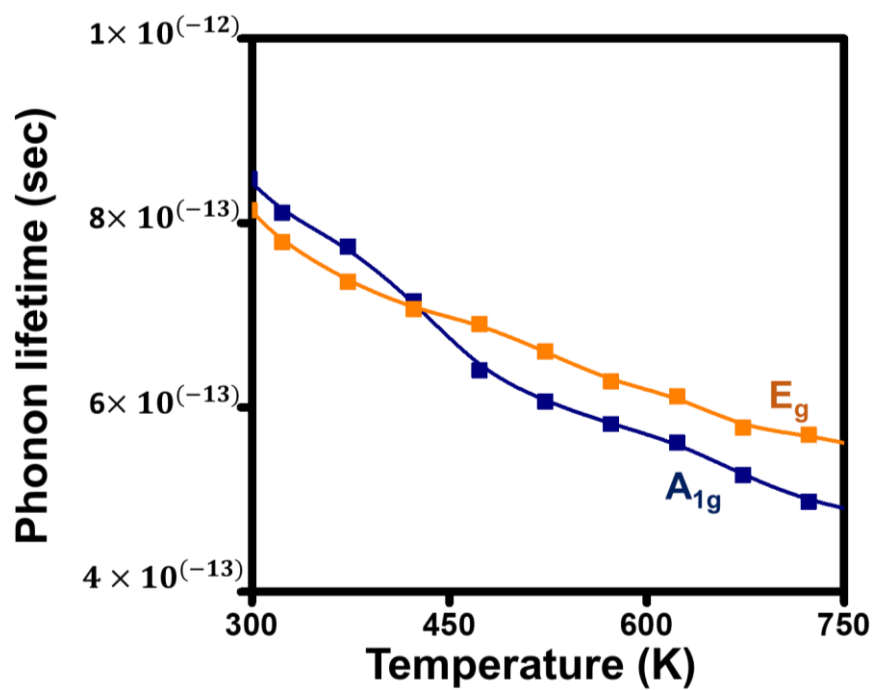

Figure S3: Phonon lifetime vs. Temperature from the range room temperature (300K) to High temperature (750K) for both Raman modes (E<sub>g</sub> and A<sub>1g</sub>) of rutile TNRs.
